# Supplementary material
Source: PubMed Central journal article supplement (PMC4135500)

# Vitamin E

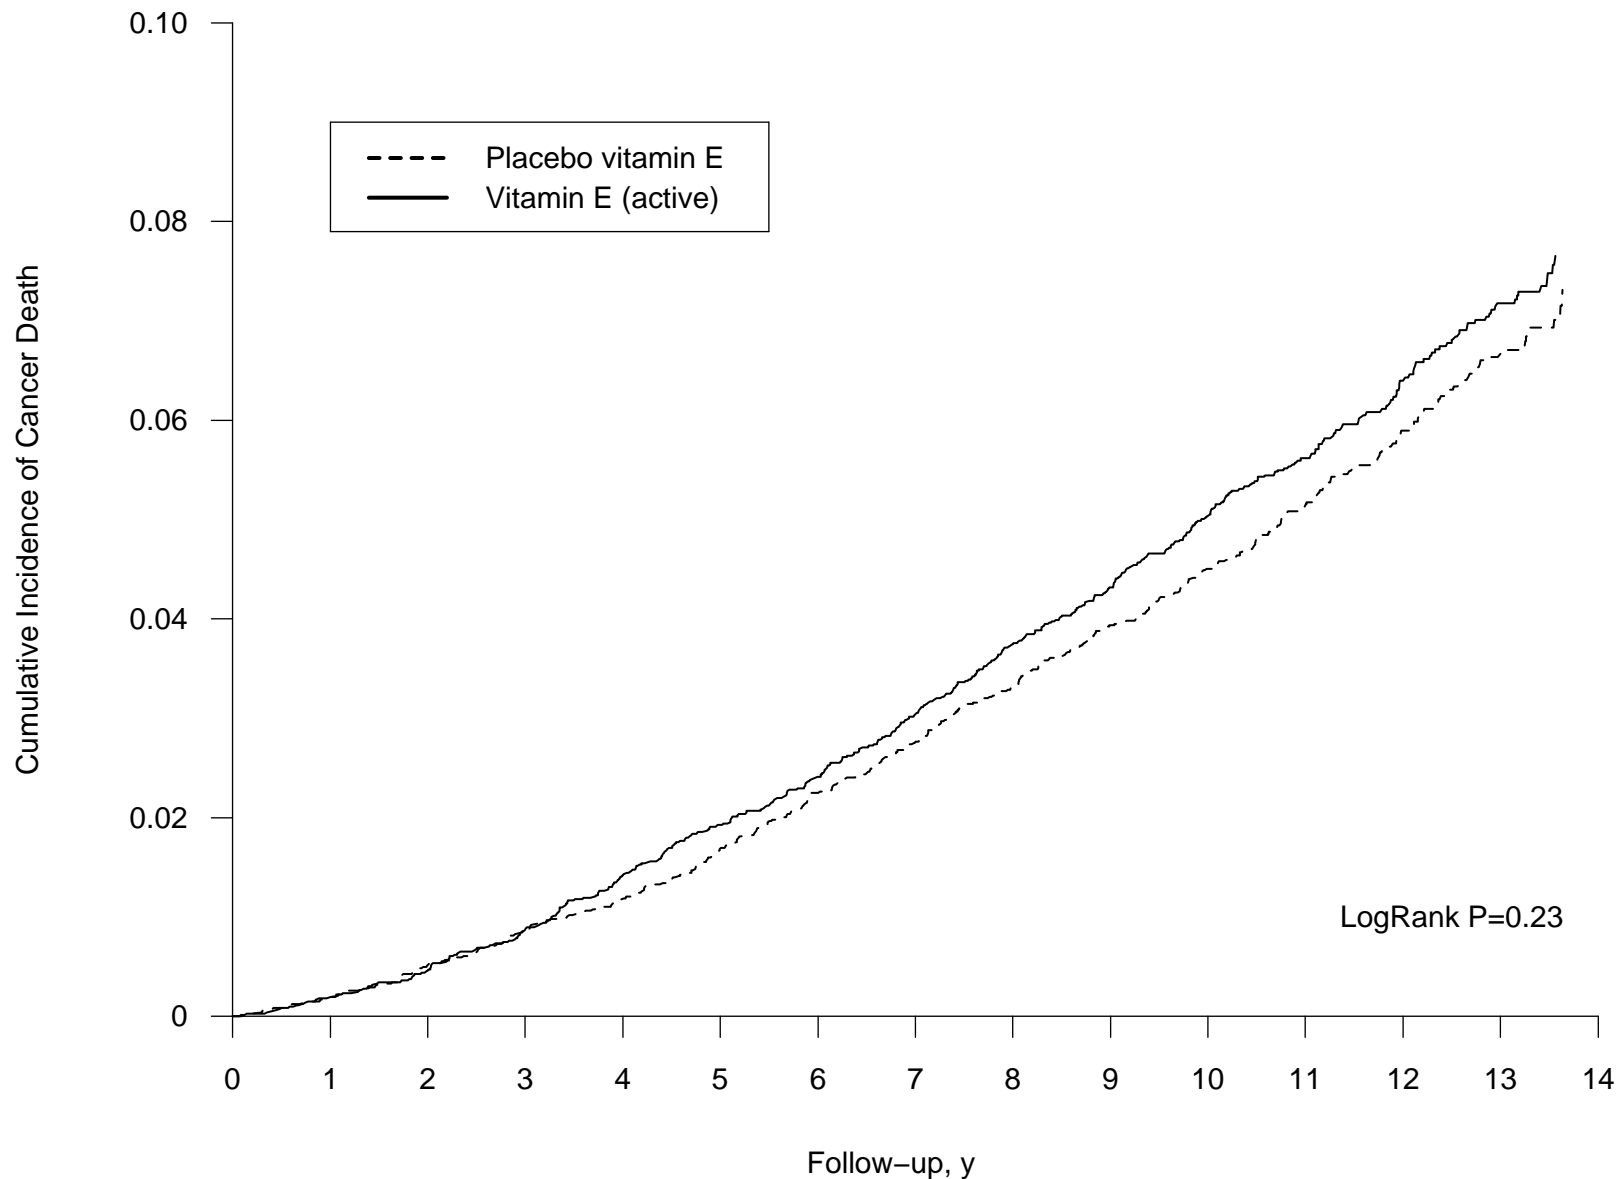

## Number at Risk

|         |      |      |      |      |      |      |      |      |      |      |      |      |      |      |
|---------|------|------|------|------|------|------|------|------|------|------|------|------|------|------|
| Placebo | 7326 | 7284 | 7218 | 7145 | 7069 | 6959 | 6857 | 6735 | 6610 | 6467 | 6326 | 4253 | 2997 | 2661 |
| Active  | 7315 | 7256 | 7197 | 7113 | 7022 | 6914 | 6828 | 6694 | 6562 | 6439 | 6283 | 4201 | 2964 | 2635 |

Supplement: 114.085480_ajcn085480SupplementaryData1.pdf [file 114.085480_ajcn085480SupplementaryData1.pdf]

# Vitamin C

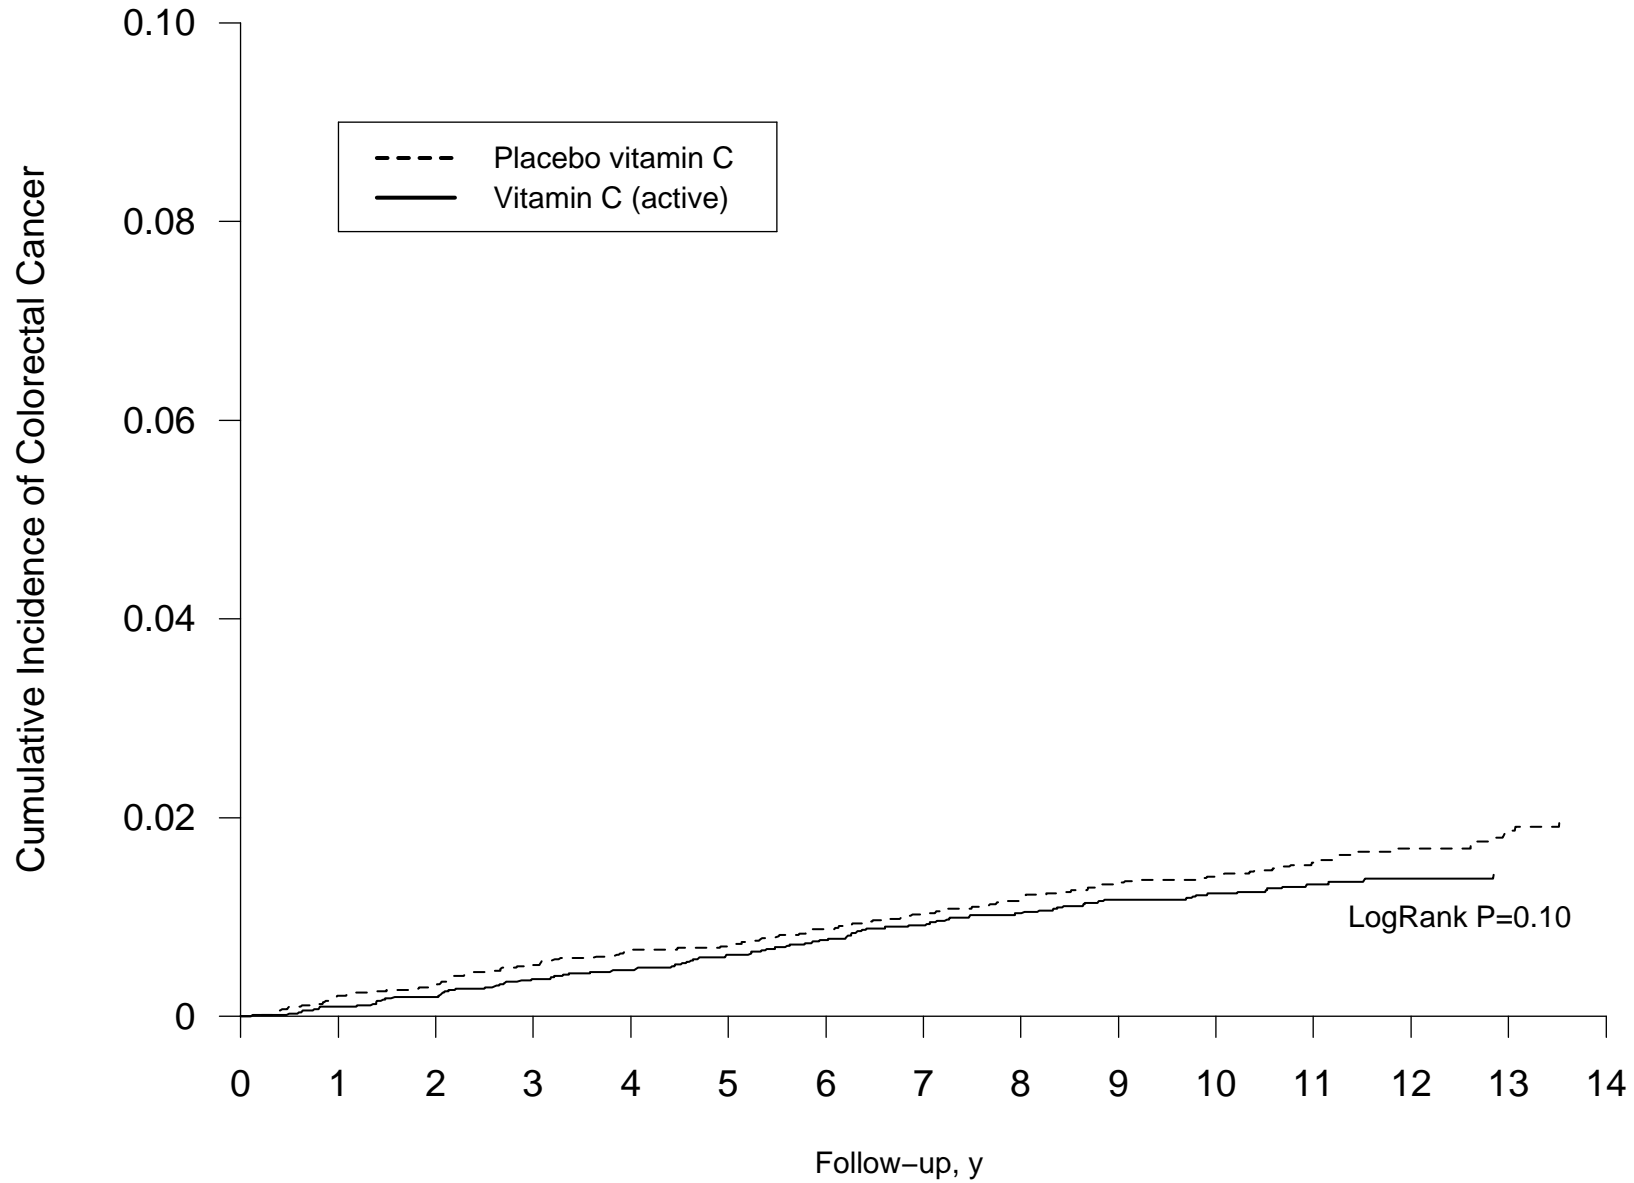

## Number at Risk

|         |      |      |      |      |      |      |      |      |      |      |      |      |      |      |
|---------|------|------|------|------|------|------|------|------|------|------|------|------|------|------|
| Placebo | 7249 | 7182 | 7114 | 7032 | 6956 | 6851 | 6752 | 6630 | 6509 | 6368 | 6223 | 4171 | 2932 | 2592 |
| Active  | 7270 | 7218 | 7151 | 7059 | 6964 | 6851 | 6751 | 6614 | 6479 | 6345 | 6207 | 4153 | 2922 | 2609 |

Supplement: 114.085480_ajcn085480SupplementaryData2.pdf [file 114.085480_ajcn085480SupplementaryData2.pdf]
